# Supplementary material for: Floral transcriptomes reveal gene networks in pineapple floral growth and fruit development
Source: PubMed Central journal article supplement (PMC7483743; doi:10.1038/s42003-020-01235-2), 2020-09-10
Supplement: 42003_2020_1235_MOESM1_ESM.pdf [file 42003_2020_1235_MOESM1_ESM.pdf]

**Supplemental Figure 1**

**A**

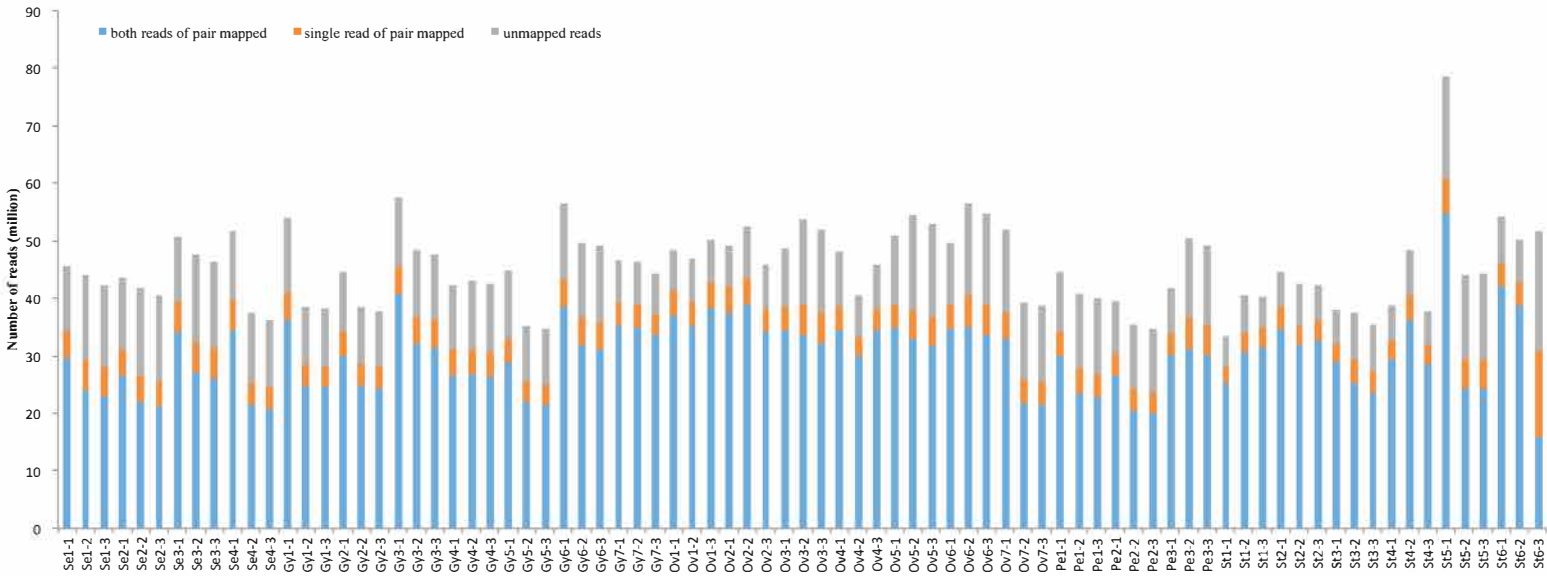

**B**

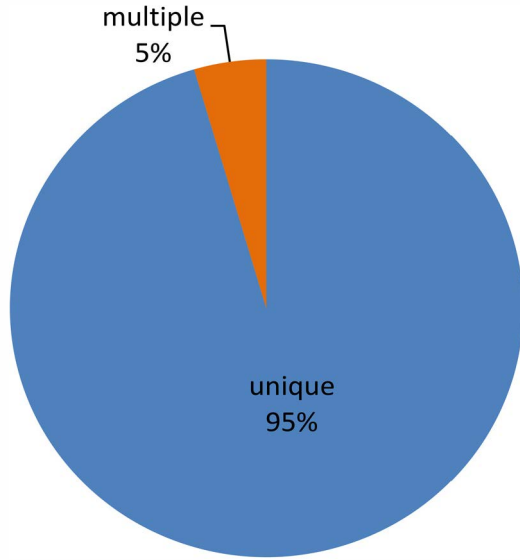

Supplementary Figure 1. Statistics for the mapping of RNA-seq reads to the pineapple reference genome assembly

A For each sample and biological replicate, the number of RNA-seq read pairs that fell into the following alignment categories: both reads aligned (light blue), one read aligned (orange) and unmapped (gray). The pineapple reference genome assembly was used for mapping

B. Percentage of uniquely mapped reads (exactly one mapping location; blue) and reads with multiple mapping locations with identical alignment scores (orange)

**A**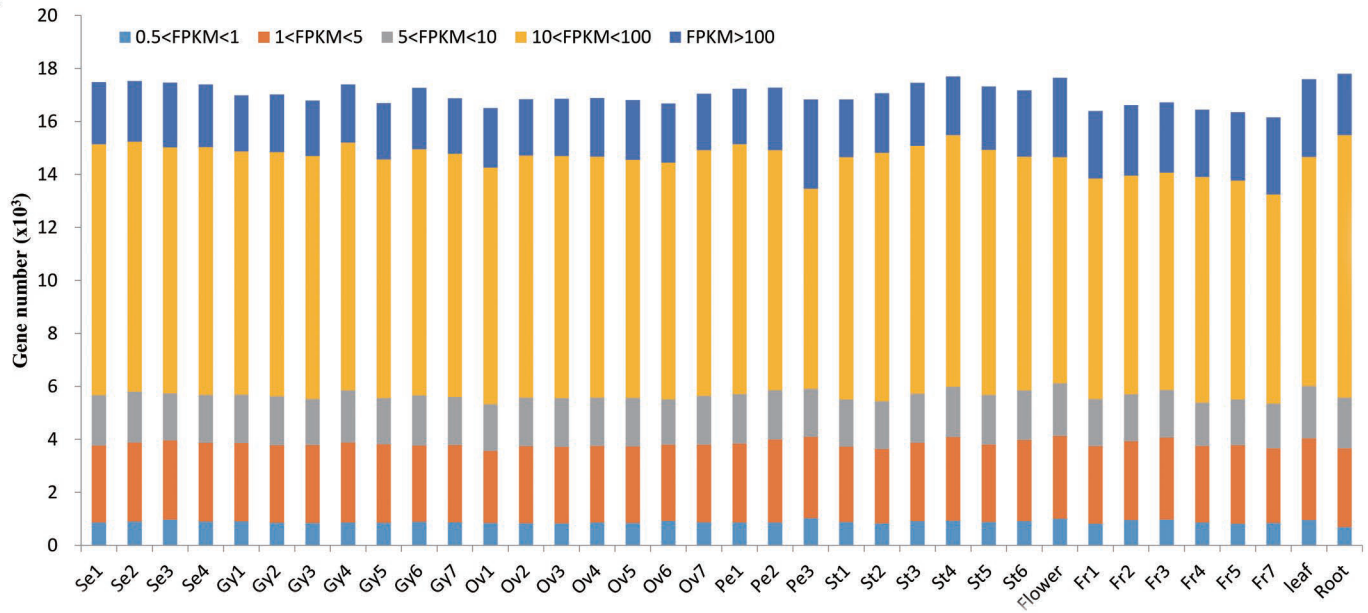**B**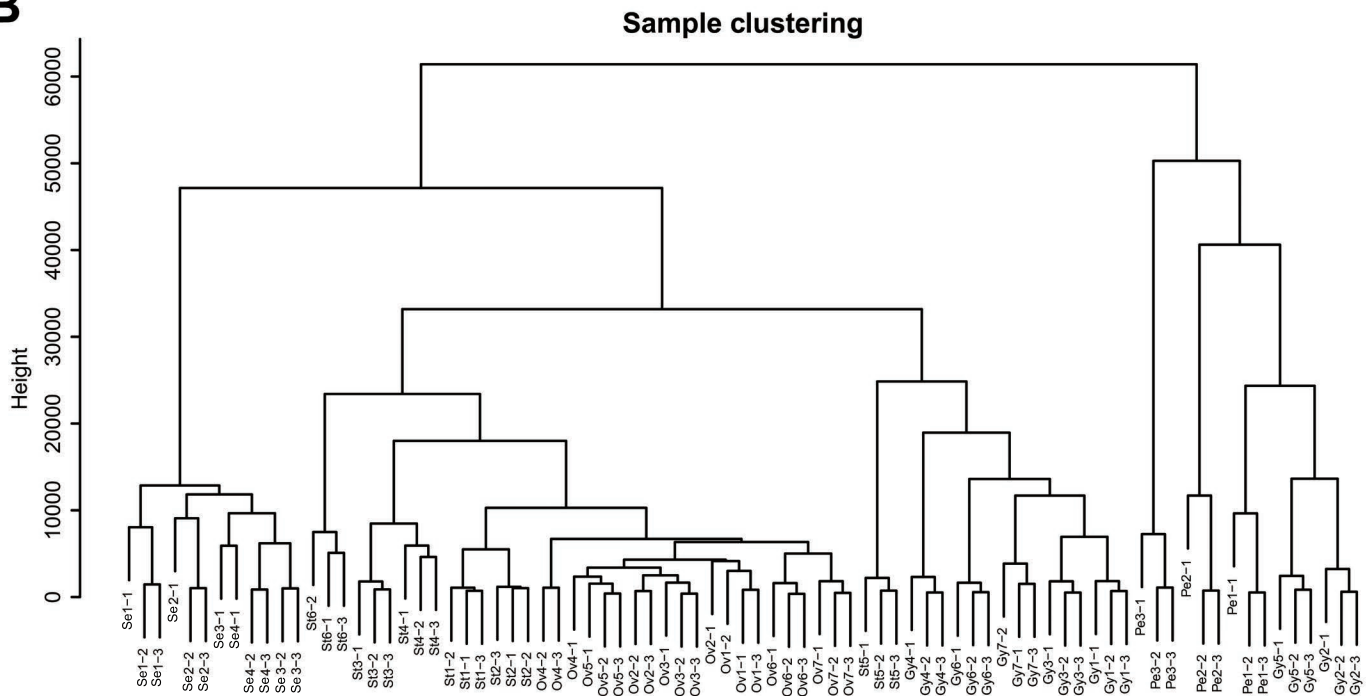

Supplementary Figure 2. Global analysis of pineapple RNA-seq data.

A. The distribution of genome-wide gene transcription levels derived from the pineapple RNA-seq data.

B. Hierarchical agglomerative sample clustering of the floral samples. Note that three biological replicates are clustered together, indicating the reproducibility of the data.

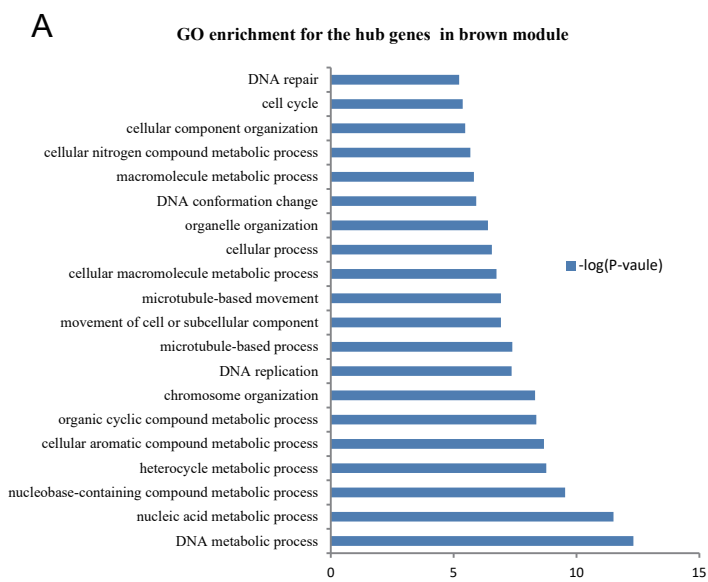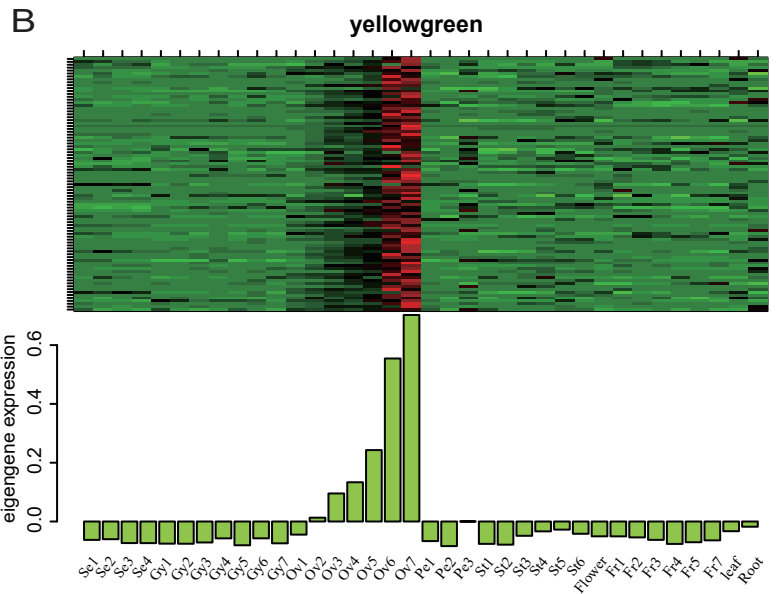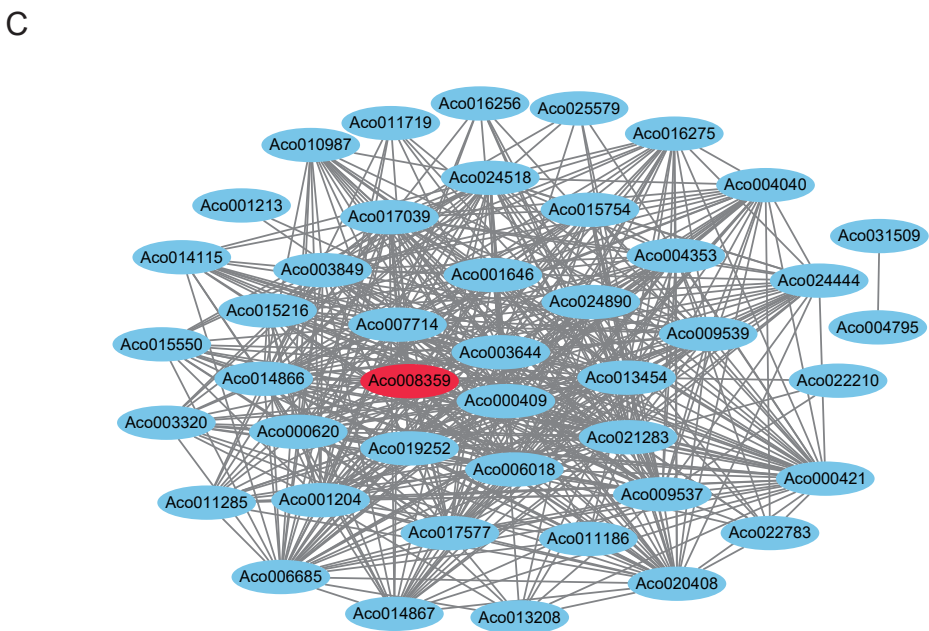

Supplementary Figure 3. Genes and network diagram of the yellowgreen module.

A. GO enrichment for the hub genes in brown module.

B. Eigengene expression profile for the yellowgreen module in different tissues. Top panel: expression heatmap showing the relative FPKM of each gene from the yellowgreen module. Bottom panel: the x axis indicates the samples, and the y axis indicates the  $\log_2$  "relative FPKM values" of the module eigengene.

C. Correlation network of the yellowgreen module. The Cytoscape-generated diagram includes 44 genes with edge weights greater than 0.3. The red oval indicates a transcription factor gene.

### GO enrichment for the lightyellow module

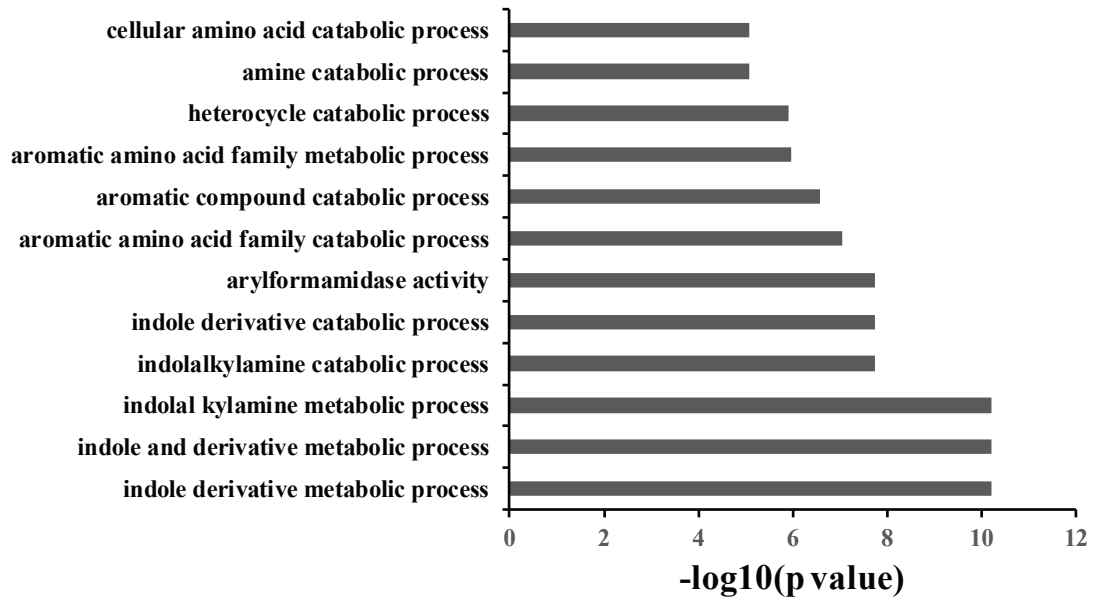

Supplementary Figure 4. GO enrichment for the lightyellow module.





A

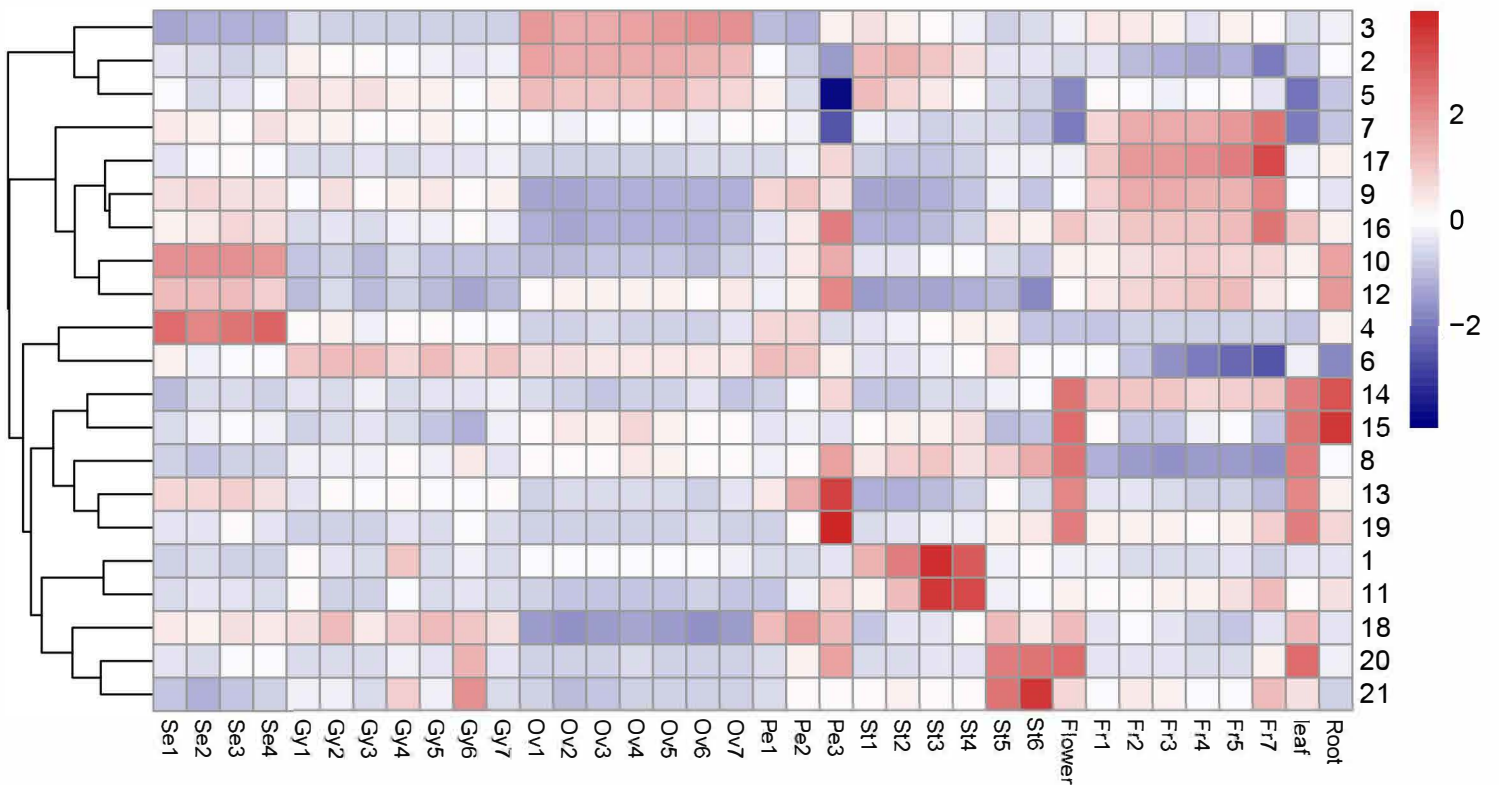

B

brown and lightyellow module

grey60 and white module

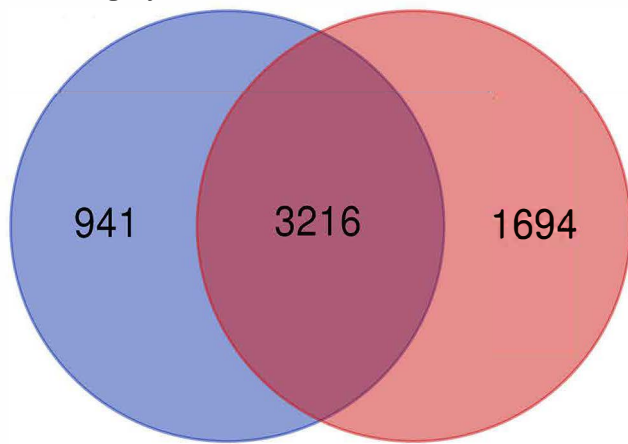

Supercluster 1(C2, C3 and C5)

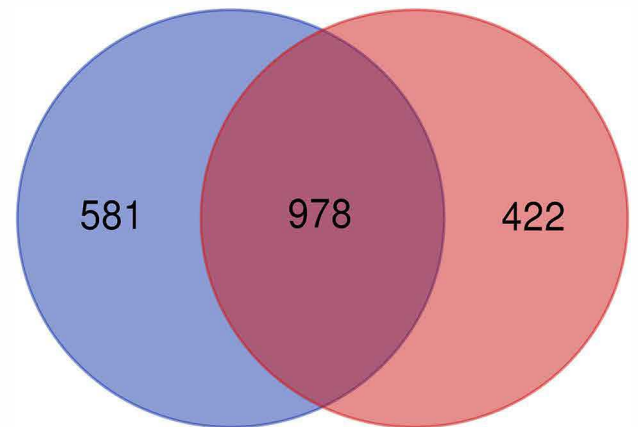

Supercluster 4(C1 and C11)

Supplementary Figure 6.

A Twenty-one K-means clusters of 19,832 genes with distinct tissue- and stage-specific expression patterns

B. Venn diagram showing the overlap ovule associated genes and stamen associated genes between WGCNA and K-means.

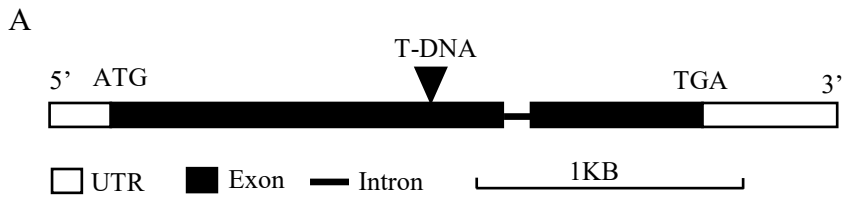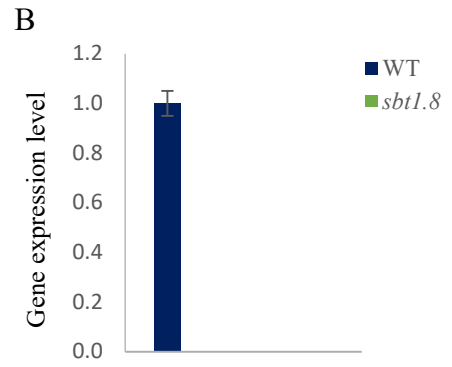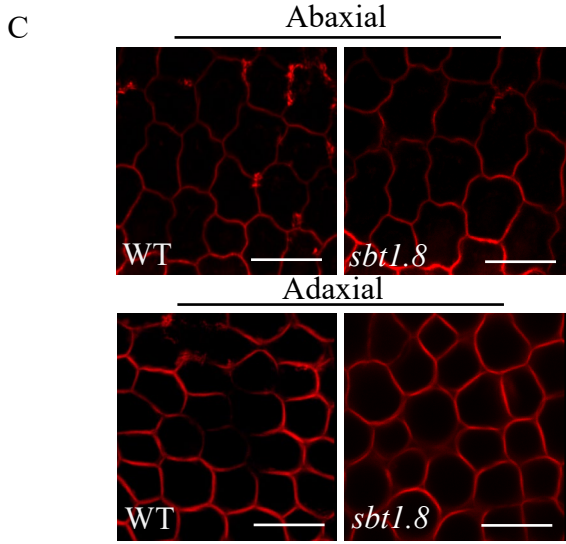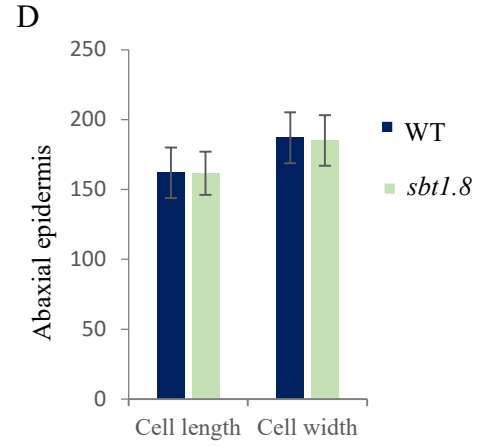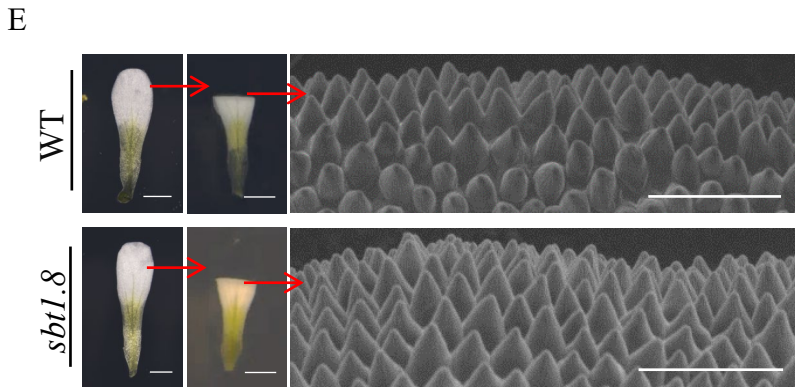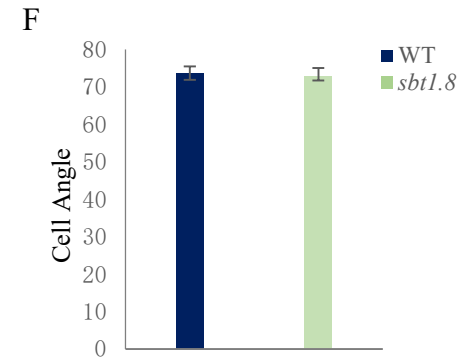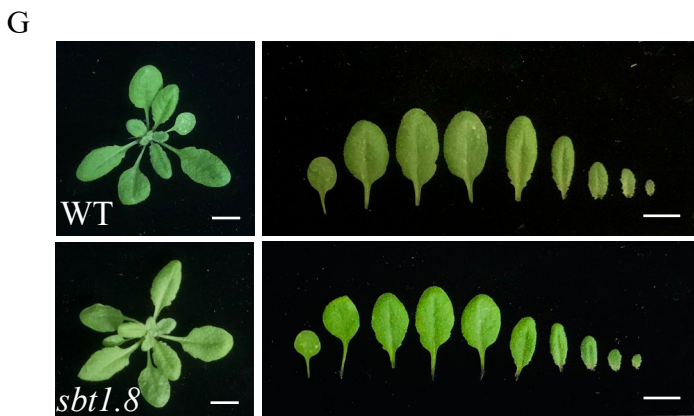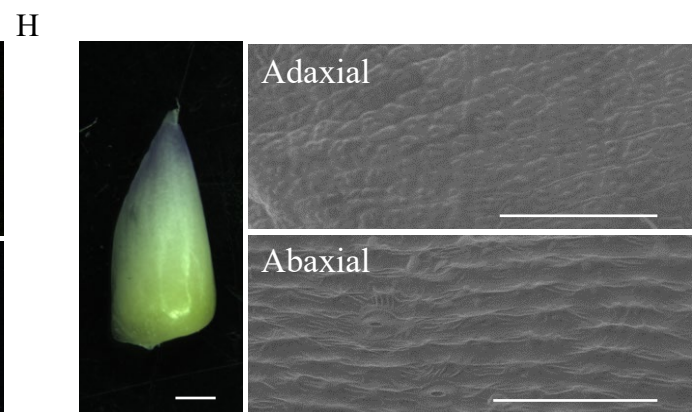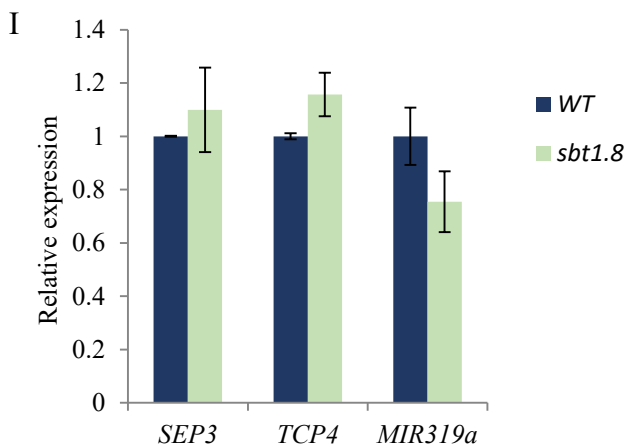

Supplementary Figure 7. Phenotypic characterization of the *sbt1.8* mutant.

A. *AtSBT1.8* gene diagram including the Salk\_020799 T-DNA insertion site.

B. *AtSBT1.8* expression level in WT and *sbt1.8*.

C-D. Petal blade abaxial and adaxial cell phenotypes and cell size quantification in WT and *sbt1.8*. Bar = 100  $\mu$ m.

E-F . Petal blade adaxial conical cell phenotype analyzed by scanning electron microscopy (SEM) and quantification of the conical cell angle in WT and *sbt1.8*. Bar = 1 mm in the stereomicroscope images and 100  $\mu$ m in the SEM images.

G. The leaf phenotype of WT and the *sbt1.8* mutant. Bar = 1 mm.

H. Pineapple petal blade adaxial cell phenotype analyzed by SEM. Bar = 1 mm in the stereomicroscope image and 100  $\mu$ m in the SEM images.

I. The expression of SEP3, TCP4 and MIR319a in WT and *sbt1.8* mutant.

Supplementary Table 1. Ten transcriptional factors (TFs) among the lightyellow hub genes.

| <b>ID</b> | <b>kME</b> | <b>P-value</b> | <b>Description</b>                              | <b>TF</b>   | <b>Ortholog gene</b> |
|-----------|------------|----------------|-------------------------------------------------|-------------|----------------------|
| Aco000069 | 0.927      | 5.09E-16       | WRKY family transcription factor family protein | WRKY        | AT4G26640/AtWRKY20   |
| Aco002567 | 0.902      | 6.08E-14       | WRKY DNA-binding protein 48                     | WRKY        | AT5G49520/AtWRKY48   |
| Aco018555 | 0.912      | 1.05E-14       | NAC domain containing protein 17                | NAC         | AT1G34190/ AtNAC017  |
| Aco008183 | 0.975      | 6.91E-24       | Homeobox protein knotted-I-like protein         | HB:TALE     | AT1G23380/AtKNAT6    |
| Aco012803 | 0.915      | 6.21E-15       | Homeobox transcription factor KN4               | HB:TALE     | AT4G08150/ AtKNAT1   |
| Aco015871 | 0.967      | 1.11E-21       | Homeobox protein knotted-I-like protein         | HB:TALE     | AT5G25220/ AtKNAT3   |
| Aco001167 | 0.902      | 6.19E-14       | bZIP transcription factor family                | bZIP        | AT4G00120/ AtIND1    |
| Aco005342 | 0.906      | 2.80E-14       | Transcription factor bHLH144                    | bHLH        | AT1G29950/ AtSACL3   |
| Aco009511 | 0.941      | 1.31E-17       | Ethylene-responsive transcription factor        | AP2/ERF:ERF | AT1G53910/ AtERF74   |
| Aco021063 | 0.942      | 9.98E-18       | Ethylene-responsive transcription factor        | AP2/ERF:ERF | AT3G14230/ AtRAP2.2  |
